# Supplementary material for: Cognitive Sparing in Proton versus Photon Radiotherapy for Pediatric Brain Tumor Is Associated with White Matter Integrity: An Exploratory Study
Source: MDPI journal article supplement (doi:10.3390/cancers15061844), 2023-03-19
Supplement: s1 [file s1]

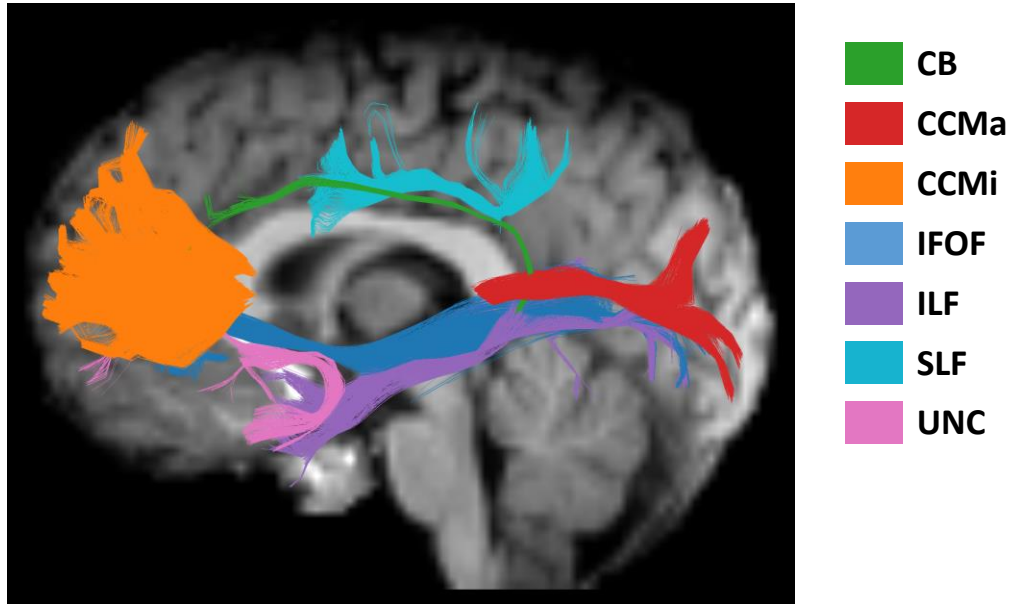

**Figure S1.** Color-coded tracts of interest are shown for a 12-year-old male participant in the control group. Cingulum bundle (CB); Corpus callosum major forceps (CCMa); Corpus callosum minor forceps (CCMi); Inferior fronto-occipital fasciculus (IFOF); Inferior longitudinal fasciculus (ILF); Superior longitudinal fasciculus (SLF); Uncinate fasciculus (UNC)

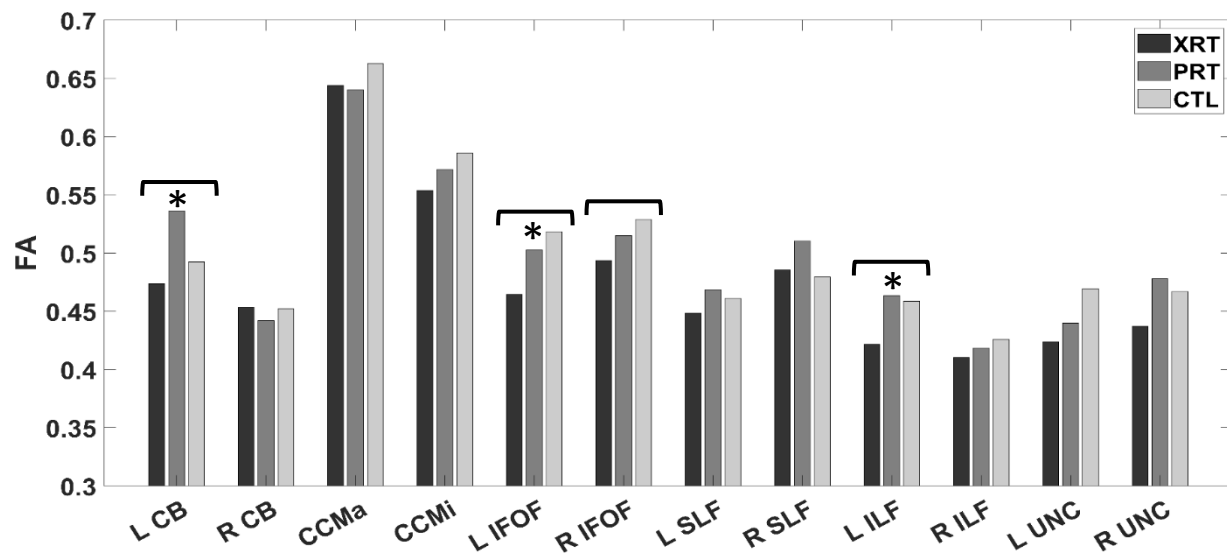

**Figure S2.** Unadjusted FA group means are shown for each tract for focal radiotherapy patients only. Group differences were determined by ANCOVA with age and handedness as covariates, with  $\alpha = .05$ . Significant omnibus group differences (XRT-PRT-CTL) are depicted by brackets. Significant XRT-PRT differences are depicted by \*.

**Table S1. Tumor Types and Locations for XRT and PRT Patients**

| Patient ID | Group | Tumor Type                        | Primary Site                                    | Other Tumor Sites                                                                                                                                                                                                                                                                                                  | Laterality |
|------------|-------|-----------------------------------|-------------------------------------------------|--------------------------------------------------------------------------------------------------------------------------------------------------------------------------------------------------------------------------------------------------------------------------------------------------------------------|------------|
| PRT01      | PRT   | Medulloblastoma                   | 4 <sup>th</sup> ventricle, arises from vermis   | ---                                                                                                                                                                                                                                                                                                                | ---        |
| PRT02      | PRT   | Medulloblastoma                   | Posterior fossa                                 | Extension through foramen of Luschka                                                                                                                                                                                                                                                                               | ---        |
| PRT03      | PRT   | Medulloblastoma                   | Cerebellum                                      | Extension into right cerebellopontine angle cistern; Extends along right cisternal nerves 7 and 8 within cerebellopontine angle                                                                                                                                                                                    | ---        |
| PRT04      | PRT   | Pilocytic astrocytoma             | Left thalamus                                   | ---                                                                                                                                                                                                                                                                                                                | Left       |
| PRT05      | PRT   | Anaplastic ependymoma             | Frontal lobe                                    | ---                                                                                                                                                                                                                                                                                                                | Left       |
| PRT06      | PRT   | Pilomyxoid astrocytoma (Grade II) | Hypothalamus/suprasellar                        | Extension into 3 <sup>rd</sup> ventricle                                                                                                                                                                                                                                                                           | ---        |
| PRT07      | PRT   | Pilocytic astrocytoma             | 4 <sup>th</sup> ventricle                       | Cystic component left of midline; Left middle cerebellar peduncle                                                                                                                                                                                                                                                  | ---        |
| PRT08*     | PRT   | Medulloblastoma                   | Posterior fossa                                 | ---                                                                                                                                                                                                                                                                                                                | ---        |
| PRT09      | PRT   | Craniopharyngioma                 | Hypothalamus/suprasellar                        | Impinging on 3 <sup>rd</sup> ventricle                                                                                                                                                                                                                                                                             | ---        |
| PRT10      | PRT   | Pilocytic astrocytoma             | Hypothalamus/suprasellar                        | Extends into 3 <sup>rd</sup> ventricle                                                                                                                                                                                                                                                                             | ---        |
| PRT11      | PRT   | Desmoplastic ganglioglioma        | Left basal ganglia;<br>Left cerebral hemisphere | Extends into insula and left frontal and temporal lobes                                                                                                                                                                                                                                                            | Left       |
| PRT12      | PRT   | Anaplastic ependymoma             | Anterior vermis                                 | Cystic loculation in left cerebellar medullary angle; Extends into 4 <sup>th</sup> ventricle; Growth into bilateral foramina Luschka and through foramen of Magendie; Extends along posterior aspect of cervical medullary junction to level of posterior C1 canal; Extension into left cerebellar medullary angle | ---        |
| XRT01*     | XRT   | Pilocytic astrocytoma             | Cerebellum;<br>Brainstem/pons                   | ---                                                                                                                                                                                                                                                                                                                | ---        |
| XRT02      | XRT   | Medulloblastoma                   | 4 <sup>th</sup> ventricle                       | Extension into aqueduct;                                                                                                                                                                                                                                                                                           | ---        |

|        |     |                                                          |                                                                       |                                                                                                                         |       |
|--------|-----|----------------------------------------------------------|-----------------------------------------------------------------------|-------------------------------------------------------------------------------------------------------------------------|-------|
|        |     |                                                          |                                                                       | Extension into cerebello-medullary angle through left foramen of Luschka                                                |       |
| XRT03  | XRT | Choroid plexus carcinoma                                 | Posterior horn of the right lateral ventricle                         | ---                                                                                                                     | Right |
| XRT04* | XRT | Pilocytic astrocytoma                                    | Hypothalamus/suprasellar                                              | ---                                                                                                                     | ---   |
| XRT05  | XRT | Medulloblastoma                                          | Posterior fossa anterior to vermis; filling 4 <sup>th</sup> ventricle | Extension down through the plane with tonsils at the level of the obex; Partial extension into left foramen of Luschka. | ---   |
| XRT06  | XRT | Atypical choroid plexus tumor                            | Posterior fossa; Cerebellar pontine angle cistern; Foramen of Luschka | Extends through foramen magnum                                                                                          | ---   |
| XRT07  | XRT | Primitive neuroectodermal tumor- Not otherwise specified | Frontal lobe                                                          | ---                                                                                                                     | Left  |
| XRT08  | XRT | Anaplastic ependymoma                                    | Posterior fossa                                                       | Extension of tumor to C3-C4                                                                                             | ---   |
| XRT09  | XRT | Medulloblastoma                                          | 4 <sup>th</sup> ventricle                                             | Extension into foramen of Magendie; Extension behind medulla and upper spinal cord; Extension into upper spinal canal   | ---   |
| XRT10  | XRT | High grade neoplasm with small blue cell features        | Frontal lobe; Temporal lobe; Hypothalamus/suprasellar                 | ---                                                                                                                     | Right |

<sup>1</sup>Tumor locations are based on each patient's first MRI report prior to surgical resection. Three patients (denoted by \*) had this MRI at an outside hospital. Outside MRI records were reviewed by a neuro-oncologist who determined tumor location.

**Table S2. Results of Linear Mixed Models: Focal Radiotherapy Patients Only**

|    | <b>XRT (<i>n</i> = 5) vs. PRT (<i>n</i> = 8)</b> |          |             | <b>PRT (<i>n</i> = 8) vs. CTL (<i>n</i> = 23)</b> |          |          |
|----|--------------------------------------------------|----------|-------------|---------------------------------------------------|----------|----------|
|    | <i>β</i>                                         | <i>t</i> | <i>p</i>    | <i>β</i>                                          | <i>t</i> | <i>p</i> |
| FA | -0.034                                           | -2.47    | <b>.014</b> | 0.007                                             | .706     | .480     |
| AD | -0.023                                           | -0.87    | .380        | -0.009                                            | -0.52    | .603     |
| RD | 0.036                                            | 3.22     | <b>.001</b> | -0.011                                            | -1.41    | .159     |

<sup>1</sup>*β*, *t*, and - and *p*-values are derived from linear mixed models with handedness and age as fixed covariates and subject as a random variable.

<sup>2</sup>**Bold text** indicates *p* < .05.

**Table S3. Neuropsychological Test Scores: Focal Radiotherapy Patients Only**

|      | XRT (n=5)   |          | PRT (n=8)    |          | CTL (n =23)  |          |
|------|-------------|----------|--------------|----------|--------------|----------|
|      | Mean(SD)    | Min-Max  | Mean(SD)     | Min-Max  | Mean(SD)     | Min-Max  |
| FSIQ | 89.4 (12.9) | 72 – 106 | 104.4 (11.5) | 93 – 129 | 99.7 (10.9)  | 84 - 125 |
| VCI  | 88.0 (11.7) | 78 – 107 | 107.8 (13.7) | 92 – 136 | 98.1 (12.8)  | 78 – 118 |
| PRI  | 98.4 (19.0) | 75 – 119 | 108.3 (9.6)  | 96 – 125 | 100.0 (12.3) | 79 – 125 |
| WMI  | 94.6 (7.4)  | 85 – 105 | 104.5 (14.0) | 92 – 135 | 102.2 (10.3) | 88 – 122 |
| PSI  | 82.8 (20.3) | 60 – 103 | 94.3 (18.2)  | 72 – 126 | 101.0 (11.2) | 75 – 123 |
| VMI  | 73.2 (21.3) | 50 – 103 | 95.0 (9.3)   | 82 – 112 | 86.5 (11.5)  | 50 – 104 |
| MC   | 60.8 (14.4) | 45 – 72  | 88.4 (12.9)  | 71 – 102 | 88.1 (11.4)  | 61 – 102 |

|      | XRT vs. PRT |                 | PRT vs. CTL |          |
|------|-------------|-----------------|-------------|----------|
|      | <i>t</i>    | <i>p</i>        | <i>t</i>    | <i>p</i> |
| FSIQ | -2.57       | <b>0.015</b>    | -1.08       | 0.290    |
| VCI  | -2.60       | <b>0.014</b>    | -1.37       | 0.181    |
| PRI  | -1.46       | 0.155           | -1.15       | 0.259    |
| WMI  | -1.71       | 0.097           | -0.90       | 0.374    |
| PSI  | -1.67       | 0.106           | 0.36        | 0.721    |
| VMI  | -2.23       | <b>0.033</b>    | -1.48       | 0.149    |
| MC   | -4.71       | <b>&lt;.001</b> | -0.84       | 0.405    |

<sup>1</sup>Unadjusted means are presented. *t*- and *p*-values are derived from ANCOVAs with handedness and age as covariates.

<sup>2</sup>**Bold text** indicates *p* < .05.
